# Supplementary material for: Identifying Brief Message Content for Interventions Delivered via Mobile Devices to Improve Medication Adherence in People With Type 2 Diabetes Mellitus: A Rapid Systematic Review
Source: J Med Internet Res. 2019 Jan 9;21(1):e10421. doi: 10.2196/10421 (PMC6329430; doi:10.2196/10421)
Supplement: Multimedia Appendix 1 [file jmir_v21i1e10421_app1.pdf]

## Multimedia Appendix 1

Table 1. Main characteristics of included systematic reviews.

|                                 | <b>Authors<br/>(year)</b>    | <b>K</b> | <b>Study design of<br/>primary studies</b>                                                                                                                                                                                                                      | <b>Patient<br/>populations</b>                           | <b>Medication adherence<br/>measures</b>                                                                                                             |
|---------------------------------|------------------------------|----------|-----------------------------------------------------------------------------------------------------------------------------------------------------------------------------------------------------------------------------------------------------------------|----------------------------------------------------------|------------------------------------------------------------------------------------------------------------------------------------------------------|
| <b>Quantitative<br/>reviews</b> |                              |          |                                                                                                                                                                                                                                                                 |                                                          |                                                                                                                                                      |
|                                 | Conn et al.,<br>(2009) [36]  | 43       | RCTs                                                                                                                                                                                                                                                            | Chronic and<br>acute<br>physical<br>health<br>conditions | Patient self-report, pill<br>counts, electronic event<br>monitoring system,<br>pharmacy refill data                                                  |
|                                 | Conn et al.,<br>(2015a) [37] | 218      | Healthcare<br>provider targeted<br>interventions<br>including<br>randomised and<br>non-randomised<br>treatment vs.<br>control<br>comparisons,<br>treatment pre- vs.<br>post-intervention<br>comparisons, and<br>control baseline<br>vs. outcome<br>comparisons. | Chronic and<br>acute<br>physical<br>health<br>conditions | Patient self-report,<br>medication event<br>monitoring systems,<br>pharmacy refill data,<br>healthcare provider-<br>monitored adherence<br>behaviour |
|                                 | Conn et al.,<br>(2015b) [38] | 101      | Medication<br>adherence<br>interventions<br>including<br>randomised and<br>non-randomised<br>treatment vs.<br>control<br>comparisons,<br>treatment pre- vs.<br>post-intervention<br>comparisons, and<br>control baseline<br>vs. outcome<br>comparisons.         | Hypertension                                             | Patient self-report,<br>electronic medication<br>event monitoring systems,<br>pharmacy refill data, pill<br>counts                                   |
|                                 | Conn et al.,<br>(2016) [39]  | 53       | Randomised and<br>non-randomised<br>medication<br>adherence<br>interventions                                                                                                                                                                                    | Chronic and<br>acute<br>physical<br>health<br>conditions | Patient self-report,<br>electronic medication<br>event monitoring systems,<br>pharmacy refill data, pill<br>counts                                   |
|                                 | Conn et al.,<br>(2017) [40]  | 771      | Randomised and<br>non-randomised<br>treatment vs.<br>control                                                                                                                                                                                                    | Chronic and<br>acute<br>physical<br>health               | Patient self-report,<br>electronic medication<br>event monitoring systems,<br>pharmacy refill data, pill                                             |

|  |                             |     |                                                                        |                                                                                                                             |                                                                                                                                                                                                                       |
|--|-----------------------------|-----|------------------------------------------------------------------------|-----------------------------------------------------------------------------------------------------------------------------|-----------------------------------------------------------------------------------------------------------------------------------------------------------------------------------------------------------------------|
|  |                             |     | comparisons in medication adherence interventions                      | conditions                                                                                                                  | counts                                                                                                                                                                                                                |
|  | Cutrona et al., (2010) [41] | 82  | RCTs                                                                   | Cardiovascular disease (including hypertension, coronary artery disease, chronic heart failure, dyslipidaemia) and diabetes | Patient self-report, pill bottle caps                                                                                                                                                                                 |
|  | Devine et al., (1995) [42]  | 102 | Randomised, quasi-randomised, non-randomised, or pre-post single group | Hypertension                                                                                                                | Patient self-report, prescription refill                                                                                                                                                                              |
|  | Dew et al., (2007) [43]     | 147 | Cross-sectional and prospective correlational designs                  | Recipients of organ transplantation                                                                                         | Patient self-report including patient interview and survey, family and healthcare provider report collected via interview or survey, blood level measure, electronic medication monitoring, data from medical records |
|  | Farmer et al., (2015) [26]  | 11  | RCTs of interventions                                                  | Type 2 diabetes mellitus                                                                                                    | Patient self-report including scales, questionnaires and dairies, prescription refill, redeemed prescriptions, returned medication blister packs, medication event monitoring system,                                 |
|  | Holmes et al., (2014) [44]  | 67  | Prospective correlational and longitudinal designs                     | Chronic diseases including HIV, hypertension                                                                                | Patient self-report, electronic monitoring systems                                                                                                                                                                    |
|  | Kahwati et al., (2016) [45] | 60  | RCTs                                                                   | Chronic physical health conditions                                                                                          | Patient self-report, prescription fills and refills, medication event monitoring systems                                                                                                                              |
|  | Ruppar et al., (2015) [46]  | 29  | RCTs, quasi-experimental, non-randomised, controlled trial             | Heart failure (comorbidities were common, such as hypertension, coronary                                                    | Patient self-report, pill count, electronic monitoring systems, pharmacy refill records                                                                                                                               |

|                             |                                  |    |                                                                              |                                                            |                                                                                                                                                                                   |
|-----------------------------|----------------------------------|----|------------------------------------------------------------------------------|------------------------------------------------------------|-----------------------------------------------------------------------------------------------------------------------------------------------------------------------------------|
|                             |                                  |    |                                                                              | artery disease, diabetes, and chronic respiratory disease) |                                                                                                                                                                                   |
|                             | Schedlbauer et al., (2010) [47]  | 11 | RCTs                                                                         | Cardiovascular disease                                     | Pill count, prescription refill rate, electronic monitoring systems, patient self-report in diaries and interviews, physiological measures of tracer substances in blood or urine |
|                             | Simoni et al., (2006) [48]       | 19 | RCTs                                                                         | HIV and AIDS                                               | Patient self-reported, electronic monitoring, physiological measure of viral load count                                                                                           |
|                             | Takiya et al., (2004) [49]       | 16 | RCTs                                                                         | Hypertension                                               | Varied including self-report and pill counts                                                                                                                                      |
|                             | Teeter & Kavookjian, (2014) [50] | 9  | RCTs, prospective correlational                                              | Chronic physical illnesses                                 | Patient self-report, health plan or pharmacy claims data                                                                                                                          |
|                             | Thorneloe et al., (2013) [51]    | 29 | Cross-sectional correlational and longitudinal                               | Psoriasis                                                  | Patient self-report, pharmacy refill records, medication weights and counting, medication event monitoring system, physiological measures                                         |
|                             | Xu et al., (2014) [52]           | 40 | RCTs, non-randomised, pre- and post-test studies                             | Health conditions in older adults                          | Patient self-report, pill count, pharmacy refill records                                                                                                                          |
|                             | Zomahoun et al., (2015) [53]     | 14 | RCTs, quasi-experimental, controlled pre- and post-test intervention studies | Type 2 diabetes mellitus                                   | Patient self-report, medication event monitoring systems, prescription claims data                                                                                                |
| <b>Qualitative reviews</b>  |                                  |    |                                                                              |                                                            |                                                                                                                                                                                   |
|                             | Brundisini et al., (2015) [54]   | 86 | Qualitative studies                                                          | Type 2 diabetes                                            | n/a                                                                                                                                                                               |
|                             | Kumar et al., (2016) [55]        | 21 | Qualitative studies                                                          | Type 2 diabetes and cardiovascular disease                 | n/a                                                                                                                                                                               |
|                             | McSharry et al., (2016) [56]     | 8  | Qualitative studies                                                          | Type 2 diabetes                                            | n/a                                                                                                                                                                               |
| <b>Mixed-method reviews</b> |                                  |    |                                                                              |                                                            |                                                                                                                                                                                   |

|  |                               |                                                     |                                                                                                      |                                                                                           |                                                                                                                                  |
|--|-------------------------------|-----------------------------------------------------|------------------------------------------------------------------------------------------------------|-------------------------------------------------------------------------------------------|----------------------------------------------------------------------------------------------------------------------------------|
|  | Broekmans et al., (2009) [33] | 14 (13 quantitative, 1 qualitative)                 | RCTs, prospective correlational, cross-sectional correlational, qualitative studies                  | Chronic pain, chronic headache/migraine, osteoarthritis, rheumatic diseases, fibromyalgia | Patient self-report, electronic monitoring, pill count, pharmacy refill records, physiological measures                          |
|  | Fogarty et al., (2002) [34]   | 94 (88 quantitative, 5 qualitative, 2 mixed-method) | Cross sectional correlational, prospective longitudinal correlational, studies with qualitative data | HIV and AIDS                                                                              | Patient self- or other-report, pill count, pharmacy refill records, mechanical and electronic monitoring, physiological measures |
|  | Ng et al., (2015) [35]        | 25 (15 qualitative, 10 quantitative)                | Qualitative research studies, cross-sectional correlational, case-control                            | Type 2 diabetes                                                                           | Self-designed questionnaires                                                                                                     |

AIDS acquired immunodeficiency syndrome

HIV human immunodeficiency virus

RCTs randomised controlled trials
